# Supplementary material
Source: PubMed Central journal article supplement (PMC4351345)
Supplement: supp_kwu253_kwu253supp.pdf [file supp_kwu253_kwu253supp.pdf]

## **WEB MATERIAL**

### **Improving Propensity Score Estimators' Robustness to Model Misspecification Using Super Learner**

Romain Pirracchio\*, Maya L. Petersen, and Mark van der Laan

\*Correspondence to Dr. Romain Pirracchio, Service d'Anesthésie-Réanimation, Hôpital Européen Georges Pompidou, 20 rue Leblanc, 75015 Paris, France (e-mail: [romainpirracchio@yahoo.fr](mailto:romainpirracchio@yahoo.fr)).



Web Figure 1. Causal graph.

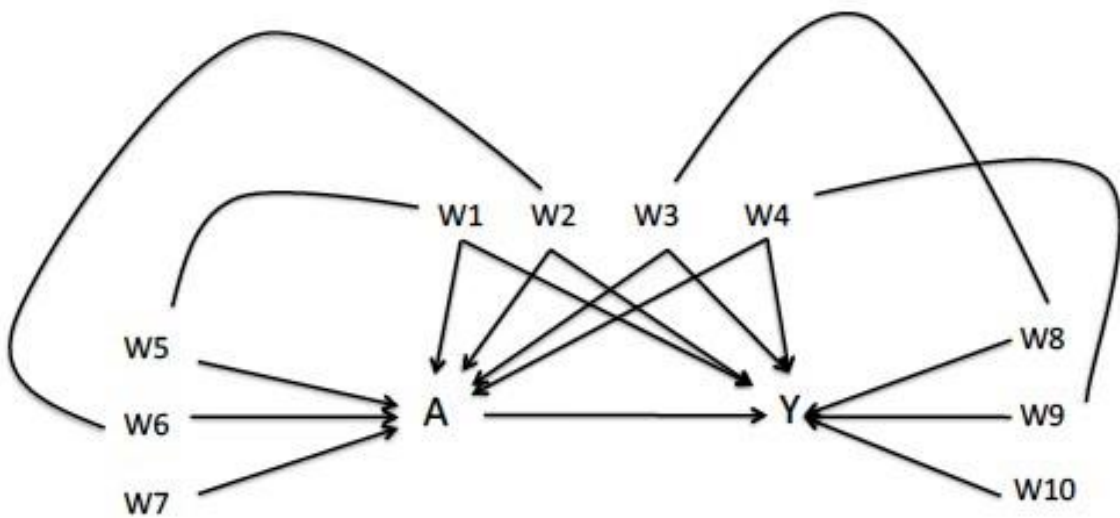

## Web Appendix

### R Code for Super Learner-Based Propensity Score Matching

```
require(SuperLearner) require(Matching)

outc_SL<-baz$z.a # z.a: outcome; baz: dataset expl_SL<-
(baz[,c(1,2,3,4,5,6,7,8,9,10)]) # explanatory variables

# PS modelling using the Super Learner
# 10-fold cross-validation
# loss function: non negative least square

loss function = non-negative least square
cv.fit <- CV.SuperLearner(Y = outc_SL, X = expl_SL, V=10, family="binomial",
SL.library=SL.library, verbose=FALSE,
cvControl=list(stratifyCV=TRUE,shuffle=TRUE,V=10),method = "method.NNLS")

predictions <- cbind(cv.fit$SL.predict,cv.fit$library.predict) ps<-predictions[,1]

# PS matching
match<-Match(Y=baz$y.a, Tr=baz$z.a, X=baz$score, caliper=0.2,
M=1,estimand="ATE",ties=TRUE,version="standard",replace=TRUE)

# Balance diagnosis
## Full Balance Diagnosis for matching

Balance<-MatchBalance(z.a ~ w1+w2+w3+w4+w5+w6+w7+w8+w9+w10,
match.out = match, digits=4, paired=T, data=baz)

sdiff.before<-sdiff.1.after<-NULL for (i in 1:10)
{
sdiff.before[i]<-Balance$BeforeMatching[[i]]$sdiff sdiff.after[i]<-
Balance$AfterMatching[[i]]$sdiff
}
```

**Web Table 2.** Covariate Balance Diagnosis (*X1, X2, X3, X4*: Confounders; *X5, X6, X7*: Exposure Predictors; *X8, X9, X10*: Outcome Predictors)

| <b>Scenario A</b> |       |                |             |            |         |
|-------------------|-------|----------------|-------------|------------|---------|
|                   | Naive | Logit Matching | SL Matching | Logit IPTW | SL IPTW |
| <i>X1</i>         | 28.4  | 0.5            | 5.6         | -0.1       | 4.1     |
| <i>X2</i>         | -35.2 | -0.1           | -5.2        | 0.1        | -3.4    |
| <i>X3</i>         | 23.7  | -0.2           | 5.6         | -0.1       | 4.4     |
| <i>X4</i>         | -32.4 | -0.3           | -4.9        | 0.1        | -3.4    |
| <i>X5</i>         | -28.1 | -0.2           | -5.7        | 0.1        | -4.1    |
| <i>X6</i>         | -35.3 | 0.2            | -5.2        | 0.1        | -3.6    |
| <i>X7</i>         | 58.5  | 0.8            | 8.2         | 0.4        | 4.7     |
| <i>X8</i>         | 2.8   | -0.1           | 0.4         | -0.1       | 0.3     |
| <i>X9</i>         | -23.2 | 0.1            | -2.7        | 0.2        | -1.4    |
| <i>X10</i>        | 0.3   | 0.2            | -0.2        | 0.1        | -0.1    |

  

| <b>Scenario B</b> |       |                |             |            |         |
|-------------------|-------|----------------|-------------|------------|---------|
|                   | Naive | Logit Matching | SL Matching | Logit IPTW | SL IPTW |
| <i>X1</i>         | 26.1  | 0.1            | 2.5         | -0.2       | 4.3     |
| <i>X2</i>         | -33.1 | 0.6            | 0.2         | 1.0        | -3.0    |
| <i>X3</i>         | 22.5  | 0.1            | 2.5         | -0.2       | 4.4     |
| <i>X4</i>         | -30.4 | 0.7            | -0.7        | 1.0        | -3.0    |
| <i>X5</i>         | -25.9 | -0.2           | -2.5        | 0.4        | -4.3    |
| <i>X6</i>         | -31.6 | -0.1           | -1.2        | 0.5        | -3.4    |
| <i>X7</i>         | 34.8  | 0.5            | 0.3         | -3.1       | 6.3     |
| <i>X8</i>         | 3.2   | 0.1            | 0.1         | -0.1       | 0.2     |
| <i>X9</i>         | -20.3 | 0.2            | 0.6         | 0.5        | -1.4    |
| <i>X10</i>        | 0.5   | 0.1            | -0.1        | -0.1       | -0.1    |

  

| <b>Scenario C</b> |       |                |             |            |         |
|-------------------|-------|----------------|-------------|------------|---------|
|                   | Naive | Logit Matching | SL Matching | Logit IPTW | SL IPTW |
| <i>X1</i>         | 43.0  | 1.2            | 6.7         | 0.3        | 4.7     |
| <i>X2</i>         | -40.0 | 0.5            | -5.2        | 2.0        | -2.7    |
| <i>X3</i>         | 37.2  | 0.8            | 6.2         | 0.1        | 4.3     |
| <i>X4</i>         | -37.2 | 0.5            | -4.6        | 2.0        | -2.7    |
| <i>X5</i>         | -25.8 | 0.1            | -5.4        | 0.7        | -4.0    |
| <i>X6</i>         | -38.8 | 0.8            | -4.7        | 1.5        | -2.7    |
| <i>X7</i>         | 38.4  | 1.4            | 6.5         | 1.0        | 4.4     |
| <i>X8</i>         | 4.4   | -0.1           | 0.4         | -0.1       | 0.5     |
| <i>X9</i>         | -27.2 | 0.5            | -2.1        | 1.4        | -0.6    |
| <i>X10</i>        | -0.3  | 0.1            | -0.1        | 0.1        | -0.2    |

**Scenario D**

|            | Naive | Logit Matching | SL Matching | Logit IPTW | SL IPTW |
|------------|-------|----------------|-------------|------------|---------|
| <i>X1</i>  | 59.6  | 9.1            | 3.7         | 1.7        | 12.8    |
| <i>X2</i>  | -35.5 | 8.0            | -1.6        | 21.9       | -4.0    |
| <i>X3</i>  | 49.7  | 6.9            | 5.1         | 0.5        | 12.5    |
| <i>X4</i>  | -35.5 | 12.5           | 2.9         | 21.9       | -4.0    |
| <i>X5</i>  | -18.1 | 5.0            | -0.9        | 9.7        | -3.2    |
| <i>X6</i>  | -32.9 | 7.0            | 1.0         | 13.0       | -3.9    |
| <i>X7</i>  | -3.4  | 0.7            | -0.2        | 2.5        | -0.8    |
| <i>X8</i>  | 6.1   | 0.4            | -0.4        | -0.3       | 1.1     |
| <i>X9</i>  | -25.7 | 7.0            | 4.0         | 12.9       | -1.4    |
| <i>X10</i> | -0.3  | -0.4           | -0.1        | -0.1       | -0.2    |

Abbreviations: IPTW, inverse probability of treatment weighting; SL, Super Learner.
